# Supplementary material for: Alcohol Consumption Levels and Health Care Utilization in Germany
Source: Atypon-hosted journal article supplement (doi:10.1024/0939-5911/a000767), 2022-06-01
Supplement: 0939-5911_a000767_esm1.pdf [file 0939-5911_a000767_esm1.pdf]

## Electronic Supplementary Material

### ESM 1. Results of regression models for the association between alcohol drinking status and health care utilization

The outputs of each binary logistic regression model, unadjusted and adjusted, are shown in the Tables below. The models were weighted to population-level in Germany. Drinking status was the only covariate included in the unadjusted models, while sex, age, socioeconomic status, self-perceived health, physical activity, life satisfaction, smoking status, heavy episodic drinking, chronic diseases, stroke, and injury were included as additional covariates in the adjusted models. Outcomes were primary care, specialist, and hospital visits, as well as staying overnight in hospitals in the last 12 months, respectively.

**Table S1.** Regression model output for primary care visits

| Parameter             | Unadjusted |             |          | Adjusted |              |          |
|-----------------------|------------|-------------|----------|----------|--------------|----------|
|                       | OR         | 95% CI      | <i>p</i> | OR       | 95% CI       | <i>p</i> |
| Intercept             | 4.73       | 4.04 – 5.56 | <0.001   | 0.97     | 0.63 – 1.50  | 0.905    |
| Drinking status       |            |             |          |          |              |          |
| Lifetime abstainers*  | 1.00       |             |          | 1.00     |              |          |
| Former                | 1.52       | 1.12 – 2.08 | 0.008    | 1.28     | 0.93 – 1.79  | 0.142    |
| Non-weekly            | 0.99       | 0.83 – 1.19 | 0.935    | 1.16     | 0.94 – 1.43  | 0.175    |
| Low-risk              | 0.82       | 0.68 – 0.97 | 0.026    | 1.02     | 0.82 – 1.28  | 0.848    |
| Risky                 | 0.75       | 0.61 – 0.91 | 0.004    | 0.87     | 0.68 – 1.12  | 0.281    |
| Sex                   |            |             |          |          |              |          |
| Females*              |            |             |          | 1.00     |              |          |
| Males                 |            |             |          | 0.72     | 0.64 – 0.80  | <0.001   |
| Age                   |            |             |          |          |              |          |
| 70+*                  |            |             |          | 1.00     |              |          |
| 60 – 69               |            |             |          | 0.92     | 0.71 – 1.18  | 0.493    |
| 50 – 59               |            |             |          | 0.69     | 0.55 – 0.86  | 0.001    |
| 40 – 49               |            |             |          | 0.68     | 0.54 – 0.84  | 0.001    |
| 30 – 39               |            |             |          | 0.68     | 0.54 – 0.86  | 0.001    |
| 18 – 29               |            |             |          | 0.84     | 0.66 – 1.06  | 0.137    |
| SES                   |            |             |          |          |              |          |
| High*                 |            |             |          | 1.00     |              |          |
| Medium                |            |             |          | 1.25     | 1.08 – 1.45  | 0.003    |
| Low                   |            |             |          | 1.12     | 0.94 – 1.34  | 0.208    |
| Self-perceived health |            |             |          |          |              |          |
| Very good*            |            |             |          | 1.00     |              |          |
| Good                  |            |             |          | 2.05     | 1.79 – 2.34  | <0.001   |
| Moderate              |            |             |          | 4.43     | 3.66 – 5.38  | <0.001   |
| Bad                   |            |             |          | 11.30    | 7.15 – 18.77 | <0.001   |
| Very bad              |            |             |          | 6.55     | 2.89 – 17.70 | <0.001   |
| Physical activity     |            |             |          | 1.08     | 1.05 – 1.11  | <0.001   |
| Life satisfaction     |            |             |          | 1.06     | 1.02 – 1.09  | 0.001    |
| Smoking               |            |             |          |          |              |          |
| Never*                |            |             |          | 1.00     |              |          |
| Former                |            |             |          | 1.35     | 1.19 – 1.55  | <0.001   |
| Occasional            |            |             |          | 1.01     | 0.81 – 1.27  | 0.913    |
| Daily                 |            |             |          | 0.94     | 0.82 – 1.08  | 0.364    |
| HED                   |            |             |          |          |              |          |
| Never*                |            |             |          | 1.00     |              |          |
| Less than monthly     |            |             |          | 1.06     | 0.91 – 1.23  | 0.439    |
| Monthly               |            |             |          | 1.05     | 0.90 – 1.22  | 0.566    |
| Weekly                |            |             |          | 0.89     | 0.73 – 1.10  | 0.271    |
| Chronic diseases      |            |             |          |          |              |          |
| None*                 |            |             |          | 1.00     |              |          |
| At least one          |            |             |          | 2.45     | 2.12 – 2.85  | <0.001   |

| <b>Parameter</b> | <b>OR</b> | <b>Unadjusted<br/>95% CI</b> | <b><i>p</i></b> | <b>OR</b> | <b>Adjusted<br/>95% CI</b> | <b><i>p</i></b> |
|------------------|-----------|------------------------------|-----------------|-----------|----------------------------|-----------------|
| Stroke           |           |                              |                 |           |                            |                 |
| None*            |           |                              |                 | 1.00      |                            |                 |
| At least one     |           |                              |                 | 0.59      | 0.32 – 1.15                | 0.099           |
| Injury           |           |                              |                 |           |                            |                 |
| None*            |           |                              |                 | 1.00      |                            |                 |
| At least one     |           |                              |                 | 1.83      | 1.55 – 2.16                | <0.001          |

*Notes.* HED: heavy episodic drinking; OR: odds ratio; *p*: p-value; SES: socioeconomic status; 95% CI: 95% confidence intervals. \* Reference category.

**Table S2.** Regression model output for specialist visits

| Parameter             | Unadjusted |             |                | Adjusted |             |                |
|-----------------------|------------|-------------|----------------|----------|-------------|----------------|
|                       | OR         | 95% CI      | <i>p</i>       | OR       | 95% CI      | <i>p</i>       |
| Intercept             | 1.75       | 1.54 – 1.98 | < <b>0.001</b> | 1.06     | 0.75 – 1.50 | 0.732          |
| Drinking status       |            |             |                |          |             |                |
| Lifetime abstainers*  | 1.00       |             |                | 1.00     |             |                |
| Former                | 1.86       | 1.46 – 2.37 | < <b>0.001</b> | 1.93     | 1.50 – 2.49 | < <b>0.001</b> |
| Non-weekly            | 0.98       | 0.85 – 1.13 | 0.809          | 1.24     | 1.05 – 1.47 | <b>0.013</b>   |
| Low-risk              | 0.97       | 0.84 – 1.13 | 0.727          | 1.39     | 1.17 – 1.67 | < <b>0.001</b> |
| Risky                 | 0.92       | 0.78 – 1.08 | 0.294          | 1.28     | 1.04 – 1.57 | <b>0.018</b>   |
| Sex                   |            |             |                |          |             |                |
| Females*              |            |             |                | 1.00     |             |                |
| Males                 |            |             |                | 0.53     | 0.48 – 0.58 | < <b>0.001</b> |
| Age                   |            |             |                |          |             |                |
| 70+*                  |            |             |                | 1.00     |             |                |
| 60 – 69               |            |             |                | 0.94     | 0.80 – 1.12 | 0.503          |
| 50 – 59               |            |             |                | 0.99     | 0.84 – 1.16 | 0.860          |
| 40 – 49               |            |             |                | 0.81     | 0.69 – 0.95 | <b>0.011</b>   |
| 30 – 39               |            |             |                | 0.88     | 0.74 – 1.04 | 0.131          |
| 18 – 29               |            |             |                | 0.81     | 0.68 – 0.96 | <b>0.014</b>   |
| SES                   |            |             |                |          |             |                |
| High*                 |            |             |                | 1.00     |             |                |
| Medium                |            |             |                | 0.86     | 0.75 – 0.98 | <b>0.020</b>   |
| Low                   |            |             |                | 0.62     | 0.53 – 0.72 | < <b>0.001</b> |
| Self-perceived health |            |             |                |          |             |                |
| Very good*            |            |             |                | 1.00     |             |                |
| Good                  |            |             |                | 1.50     | 1.32 – 1.69 | < <b>0.001</b> |
| Moderate              |            |             |                | 3.33     | 2.85 – 3.91 | < <b>0.001</b> |
| Bad                   |            |             |                | 4.33     | 3.30 – 5.72 | < <b>0.001</b> |
| Very bad              |            |             |                | 2.49     | 1.50 – 4.24 | <b>0.001</b>   |
| Physical activity     |            |             |                | 1.08     | 1.05 – 1.10 | < <b>0.001</b> |
| Life satisfaction     |            |             |                | 1.02     | 0.99 – 1.05 | 0.136          |
| Smoking               |            |             |                |          |             |                |
| Never*                |            |             |                | 1.00     |             |                |
| Former                |            |             |                | 1.04     | 0.94 – 1.16 | 0.434          |
| Occasional            |            |             |                | 0.89     | 0.74 – 1.08 | 0.253          |
| Daily                 |            |             |                | 0.80     | 0.71 – 0.90 | < <b>0.001</b> |
| HED                   |            |             |                |          |             |                |
| Never*                |            |             |                | 1.00     |             |                |
| Less than monthly     |            |             |                | 0.94     | 0.83 – 1.06 | 0.306          |
| Monthly               |            |             |                | 0.87     | 0.76 – 0.98 | <b>0.026</b>   |
| Weekly                |            |             |                | 0.87     | 0.73 – 1.03 | 0.104          |
| Chronic diseases      |            |             |                |          |             |                |
| None*                 |            |             |                | 1.00     |             |                |
| At least one          |            |             |                | 1.44     | 1.29 – 1.60 | < <b>0.001</b> |

| Parameter    | Unadjusted |        |          | Adjusted |             |                  |
|--------------|------------|--------|----------|----------|-------------|------------------|
|              | OR         | 95% CI | <i>p</i> | OR       | 95% CI      | <i>p</i>         |
| Stroke       |            |        |          |          |             |                  |
| None*        |            |        |          | 1.00     |             |                  |
| At least one |            |        |          | 0.72     | 0.48 – 1.11 | 0.124            |
| Injury       |            |        |          |          |             |                  |
| None*        |            |        |          | 1.00     |             |                  |
| At least one |            |        |          | 1.56     | 1.38 – 1.77 | <b>&lt;0.001</b> |

*Notes.* HED: heavy episodic drinking; OR: odds ratio; *p*: p-value; SES: socioeconomic status; 95% CI: 95% confidence intervals. \* Reference category. Bold p-values indicate significance at  $\alpha < 0.05$ .

**Table S3.** Regression model output for hospital outpatient visits

| Parameter             | Unadjusted |             |                  | Adjusted |             |                  |
|-----------------------|------------|-------------|------------------|----------|-------------|------------------|
|                       | OR         | 95% CI      | <i>p</i>         | OR       | 95% CI      | <i>p</i>         |
| Intercept             | 0.13       | 0.11 – 0.16 | <b>&lt;0.001</b> | 0.03     | 0.02 – 0.06 | <b>&lt;0.001</b> |
| Drinking status       |            |             |                  |          |             |                  |
| Lifetime abstainers*  | 1.00       |             |                  | 1.00     |             |                  |
| Former                | 1.14       | 0.82 – 1.57 | 0.433            | 1.04     | 0.74 – 1.46 | 0.816            |
| Non-weekly            | 0.95       | 0.77 – 1.18 | 0.633            | 0.99     | 0.77 – 1.28 | 0.948            |
| Low-risk              | 0.83       | 0.67 – 1.04 | 0.107            | 0.96     | 0.74 – 1.27 | 0.785            |
| Risky                 | 1.13       | 0.89 – 1.44 | 0.325            | 1.12     | 0.82 – 1.52 | 0.480            |
| Sex                   |            |             |                  |          |             |                  |
| Females*              |            |             |                  | 1.00     |             |                  |
| Males                 |            |             |                  | 1.00     | 0.87 – 1.15 | 0.998            |
| Age                   |            |             |                  |          |             |                  |
| 70+*                  |            |             |                  | 1.00     |             |                  |
| 60 – 69               |            |             |                  | 0.99     | 0.76 – 1.28 | 0.928            |
| 50 – 59               |            |             |                  | 1.17     | 0.93 – 1.48 | 0.182            |
| 40 – 49               |            |             |                  | 1.07     | 0.83 – 1.38 | 0.591            |
| 30 – 39               |            |             |                  | 1.49     | 1.16 – 1.93 | <b>0.002</b>     |
| 18 – 29               |            |             |                  | 1.78     | 1.39 – 2.30 | <b>&lt;0.001</b> |
| SES                   |            |             |                  |          |             |                  |
| High*                 |            |             |                  | 1.00     |             |                  |
| Medium                |            |             |                  | 1.20     | 0.97 – 1.49 | 0.109            |
| Low                   |            |             |                  | 1.34     | 1.05 – 1.72 | <b>0.019</b>     |
| Self-perceived health |            |             |                  |          |             |                  |
| Very good*            |            |             |                  | 1.00     |             |                  |
| Good                  |            |             |                  | 1.57     | 1.25 – 1.99 | <b>&lt;0.001</b> |
| Moderate              |            |             |                  | 2.62     | 2.03 – 3.41 | <b>&lt;0.001</b> |
| Bad                   |            |             |                  | 2.46     | 1.69 – 3.55 | <b>&lt;0.001</b> |
| Very bad              |            |             |                  | 4.59     | 2.51 – 8.22 | <b>&lt;0.001</b> |
| Physical activity     |            |             |                  | 1.09     | 1.05 – 1.12 | <b>&lt;0.001</b> |
| Life satisfaction     |            |             |                  | 0.96     | 0.92 – 0.99 | <b>0.010</b>     |
| Smoking               |            |             |                  |          |             |                  |
| Never*                |            |             |                  | 1.00     |             |                  |
| Former                |            |             |                  | 1.12     | 0.95 – 1.31 | 0.170            |
| Occasional            |            |             |                  | 1.31     | 0.99 – 1.73 | 0.057            |
| Daily                 |            |             |                  | 1.24     | 1.03 – 1.47 | <b>0.023</b>     |
| HED                   |            |             |                  |          |             |                  |
| Never*                |            |             |                  | 1.00     |             |                  |
| Less than monthly     |            |             |                  | 1.01     | 0.84 – 1.22 | 0.904            |
| Monthly               |            |             |                  | 1.14     | 0.94 – 1.39 | 0.176            |
| Weekly                |            |             |                  | 1.02     | 0.78 – 1.32 | 0.912            |
| Chronic diseases      |            |             |                  |          |             |                  |
| None*                 |            |             |                  | 1.00     |             |                  |
| At least one          |            |             |                  | 1.25     | 1.07 – 1.46 | <b>0.004</b>     |

| <b>Parameter</b> | <b>OR</b> | <b>Unadjusted<br/>95% CI</b> | <b><i>p</i></b> | <b>OR</b> | <b>Adjusted<br/>95% CI</b> | <b><i>p</i></b>  |
|------------------|-----------|------------------------------|-----------------|-----------|----------------------------|------------------|
| Stroke           |           |                              |                 |           |                            |                  |
| None*            |           |                              |                 | 1.00      |                            |                  |
| At least one     |           |                              |                 | 1.18      | 0.69 – 1.94                | 0.526            |
| Injury           |           |                              |                 |           |                            |                  |
| None*            |           |                              |                 | 1.00      |                            |                  |
| At least one     |           |                              |                 | 2.87      | 2.49 – 3.31                | <b>&lt;0.001</b> |

*Notes.* HED: heavy episodic drinking; OR: odds ratio; *p*: p-value; SES: socioeconomic status; 95% CI: 95% confidence intervals. \* Reference category. Bold p-values indicate significance at  $\alpha < 0.05$ .

**Table S4.** Regression model output for hospital overnight stays

| Parameter             | Unadjusted |             |                | Adjusted |              |                |
|-----------------------|------------|-------------|----------------|----------|--------------|----------------|
|                       | OR         | 95% CI      | <i>p</i>       | OR       | 95% CI       | <i>p</i>       |
| Intercept             | 0.32       | 0.28 – 0.37 | < <b>0.001</b> | 0.16     | 0.10 – 0.25  | < <b>0.001</b> |
| Drinking status       |            |             |                |          |              |                |
| Lifetime abstainers*  | 1.00       |             |                | 1.00     |              |                |
| Former                | 1.30       | 1.03 – 1.64 | <b>0.030</b>   | 1.10     | 0.85 – 1.42  | 0.485          |
| Non-weekly            | 0.56       | 0.47 – 0.66 | < <b>0.001</b> | 0.76     | 0.62 – 0.93  | <b>0.007</b>   |
| Low-risk              | 0.46       | 0.39 – 0.55 | < <b>0.001</b> | 0.66     | 0.53 – 0.81  | < <b>0.001</b> |
| Risky                 | 0.52       | 0.43 – 0.64 | < <b>0.001</b> | 0.65     | 0.51 – 0.84  | <b>0.001</b>   |
| Sex                   |            |             |                |          |              |                |
| Females*              |            |             |                | 1.00     |              |                |
| Males                 |            |             |                | 0.89     | 0.79 – 1.00  | 0.058          |
| Age                   |            |             |                |          |              |                |
| 70+*                  |            |             |                | 1.00     |              |                |
| 60 – 69               |            |             |                | 0.74     | 0.61 – 0.89  | <b>0.001</b>   |
| 50 – 59               |            |             |                | 0.66     | 0.55 – 0.78  | < <b>0.001</b> |
| 40 – 49               |            |             |                | 0.52     | 0.42 – 0.64  | < <b>0.001</b> |
| 30 – 39               |            |             |                | 0.56     | 0.45 – 0.70  | < <b>0.001</b> |
| 18 – 29               |            |             |                | 0.70     | 0.57 – 0.87  | <b>0.001</b>   |
| SES                   |            |             |                |          |              |                |
| High*                 |            |             |                | 1.00     |              |                |
| Medium                |            |             |                | 1.19     | 0.98 – 1.46  | 0.093          |
| Low                   |            |             |                | 1.29     | 1.04 – 1.62  | <b>0.023</b>   |
| Self-perceived health |            |             |                |          |              |                |
| Very good*            |            |             |                | 1.00     |              |                |
| Good                  |            |             |                | 1.51     | 1.21 – 1.91  | < <b>0.001</b> |
| Moderate              |            |             |                | 2.84     | 2.23 – 3.64  | < <b>0.001</b> |
| Bad                   |            |             |                | 4.90     | 3.60 – 6.69  | < <b>0.001</b> |
| Very bad              |            |             |                | 5.85     | 3.44 – 10.00 | < <b>0.001</b> |
| Physical activity     |            |             |                | 1.03     | 1.00 – 1.06  | <b>0.023</b>   |
| Life satisfaction     |            |             |                | 0.94     | 0.92 – 0.97  | < <b>0.001</b> |
| Smoking               |            |             |                |          |              |                |
| Never*                |            |             |                | 1.00     |              |                |
| Former                |            |             |                | 1.40     | 1.23 – 1.60  | < <b>0.001</b> |
| Occasional            |            |             |                | 0.78     | 0.56 – 1.07  | 0.133          |
| Daily                 |            |             |                | 1.19     | 1.01 – 1.40  | <b>0.034</b>   |
| HED                   |            |             |                |          |              |                |
| Never*                |            |             |                | 1.00     |              |                |
| Less than monthly     |            |             |                | 0.94     | 0.80 – 1.11  | 0.486          |
| Monthly               |            |             |                | 0.91     | 0.77 – 1.08  | 0.272          |
| Weekly                |            |             |                | 1.12     | 0.89 – 1.40  | 0.348          |
| Chronic diseases      |            |             |                |          |              |                |
| None*                 |            |             |                | 1.00     |              |                |
| At least one          |            |             |                | 1.45     | 1.28 – 1.65  | < <b>0.001</b> |



| <b>Parameter</b> | <b>OR</b> | <b>Unadjusted<br/>95% CI</b> | <b><i>p</i></b> | <b>OR</b> | <b>Adjusted<br/>95% CI</b> | <b><i>p</i></b>  |
|------------------|-----------|------------------------------|-----------------|-----------|----------------------------|------------------|
| Stroke           |           |                              |                 |           |                            |                  |
| None*            |           |                              |                 | 1.00      |                            |                  |
| At least one     |           |                              |                 | 2.23      | 1.50 – 3.31                | <b>&lt;0.001</b> |
| Injury           |           |                              |                 |           |                            |                  |
| None*            |           |                              |                 | 1.00      |                            |                  |
| At least one     |           |                              |                 | 1.97      | 1.71 – 2.26                | <b>&lt;0.001</b> |

*Notes.* HED: heavy episodic drinking; OR: odds ratio; *p*: p-value; SES: socioeconomic status; 95% CI: 95% confidence intervals. \* Reference category. Bold p-values indicate significance at  $\alpha < 0.05$ .
